# Supplementary material for: Towards a conceptualization of the hydrological processes behind changes of young water fraction with elevation: a focus on mountainous alpine catchments
Source: Copernicus journal article supplement (doi:10.5194/hess-27-2301-2023), 2023-06-22
Supplement: Supplementary file 1 [file hess-27-2301-2023-supplement.zip]

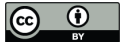

## *Supplement of*

# **Towards a conceptualization of the hydrological processes behind changes of young water fraction with elevation: a focus on mountainous alpine catchments**

**Alessio Gentile et al.**

*Correspondence to:* Bettina Schaefli ([bettina.schaefli@unibe.ch](mailto:bettina.schaefli@unibe.ch))

- [hess-27-2301-2023-supplement-title-page.pdf](#)
- SuppMat
  - [Gentile et al. SuppMat\\_Revised\\_Version\\_20230422.pdf](#)
  - [baseflowFilterDuncan.m](#)
  - [youngfraction](#)
    - \* [IRLS\\_fit.m](#)
    - \* [importIsoP.m](#)
    - \* [importIsoQ.m](#)
    - \* [importP.m](#)
    - \* [importQ.m](#)
    - \* [youngfraction.m](#)

The copyright of individual parts of the supplement might differ from the article licence.
